# Supplementary material for: The Elevated Inflammatory Status of Neutrophils Is Related to In-Hospital Complications in Patients with Acute Coronary Syndrome and Has Important Prognosis Value for Diabetic Patients
Source: MDPI journal article supplement (doi:10.3390/ijms25105107), 2024-05-08
Supplement: s1 [file s1]

**Supplementary Table S1:****Table S1.** The sequences of oligonucleotide primers used for evaluation of gene expression.

| <b>Gene<br/>(Human)</b> | <b>Sequences of Oligonucleotide Primers</b>                |
|-------------------------|------------------------------------------------------------|
| CCL3                    | FW: AGTTCTCTGCATCACTTGCTG<br>RV: CCGCTTCGCTTGGTTAGGAA      |
| IL-1 $\beta$            | FW: AGAGTGGAGCCTGGTCTTACA<br>RV: CCTTTGCTGACAATAAGCACTGG   |
| IL-18                   | FW: GATAGCCAGCCTAGAGGTATGG<br>RV: CCTTGATGTTATCAGGAGGATTCA |
| S100A9                  | FW: TCCTCGGCTTTGACAGAGTG<br>RV: GCCCCAGCTTCACAGAGTAT       |
| IL-6                    | FW: CTGCAGAATTCCAGGACCACA<br>RV: TCCGGTGGTGTAAGAGGAC       |
| ICAM-1                  | FW: GGTTCCTCTGAGCGGCGTCG<br>RV: CCAGCCGAGGACCATACAGC       |
| p22phox                 | FW: CCCAGTGGTACTTTGGTGCC<br>RV: GCGGTCATGTACTTCTGTCCC      |
| Nox2                    | FW: ACCGGGTTTATGATATTCCACCT<br>RV: GATTTCGACAGACTGGCAAGA   |
| MMP-9                   | FW: AGACCTGGGCAGATTCCAAAC<br>RV: CGGCAAGTCTTCCGAGTAGT      |
| TLR4                    | FW: CACACCGTCATCAGCATTGA<br>RV: CTCTGGCGTAGAGCTATCACT      |

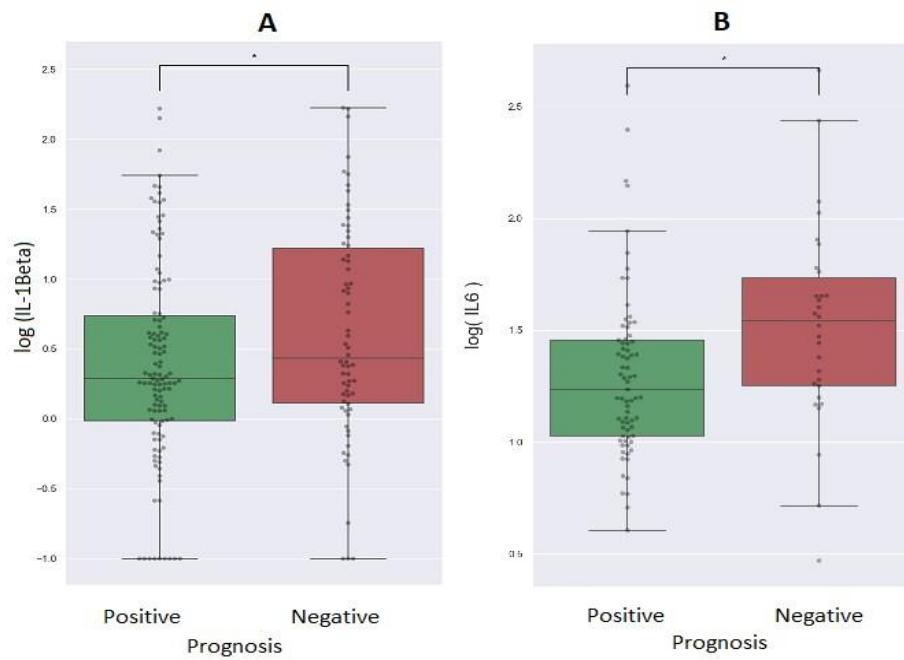

**Supplementary Figure S1.** Box plots showing the comparison of Interleukine Beta 1 (IL1-Beta) (A) and Interleukine 6 (IL-6) (B) levels between patients with favorable vs unfavorable prognosis (Student t test, \* $p < 0.05$ ).

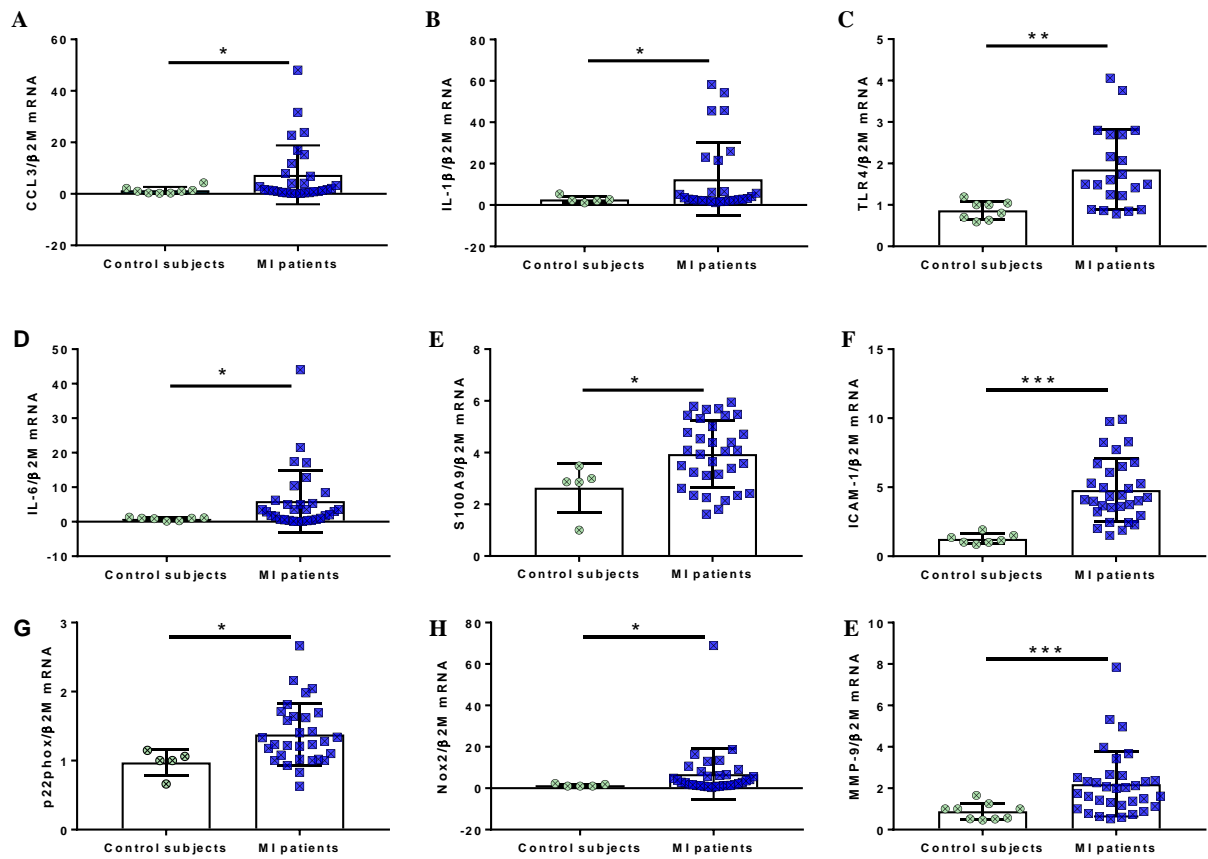

**Supplementary Figure S2. Gene expression of inflammatory molecules in MI patients versus health controls.** Neutrophils from MI patients exhibit increased expression of all investigated genes. (A-E) The expression of genes associated with an inflammatory phenotype of neutrophils CCL3, IL-1 $\beta$ , IL-18, IL-6, S100A9, ICAM-1, as well as of p22phox, Nox-2, and MMP-9 were investigated in neutrophils from control healthy subjects or patients with MI (M\_NP). \* $p < 0.05$ , \*\* $p < 0.01$ , \*\*\* $p < 0.001$  (control vs. MI).

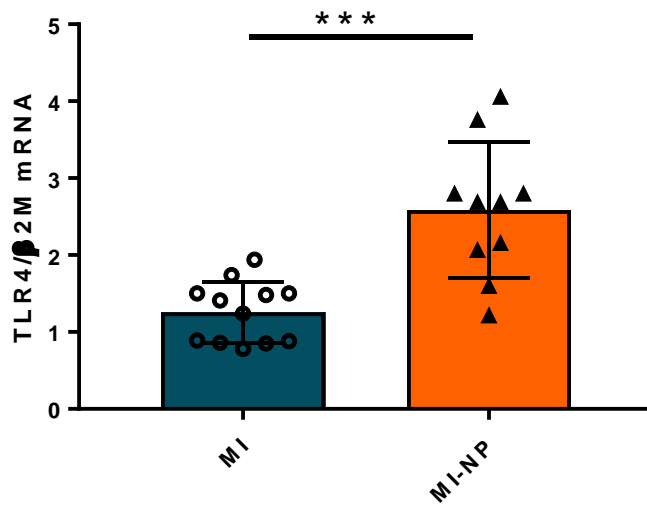

**Supplementary Figure S3. Gene expression of TLR4 in MI patients with or without negative prognosis.** Neutrophils from ACS patients with negative prognostic exhibit increased expression of TLR4 in neutrophils isolated within first 24h after MI onset., \*\*\* $p < 0.001$ , (MI\_NP vs. MI).
